# Supplementary material for: Metabolomics Profiling Reveals the Role of PEDF in Triple-Negative Breast Cancer Cell MDA-MB-231 under Glycaemic Loading
Source: MDPI journal article supplement (doi:10.3390/pharmaceutics15020543), 2023-02-06
Supplement: s1 [file s1]

# **Metabolomics profiling reveals the role of PEDF on triple-negative breast cancer cells under glycaemic loading**

**Raziyeh Abooshahab <sup>1</sup>, Kourosh Hooshmand <sup>2</sup>, Giuseppe Luna <sup>1</sup>, Hani Al-Salami <sup>1,3</sup>  
and Crispin R. Dass <sup>1,4,\*</sup>**

<sup>1</sup> Curtin Medical School, Curtin University, Bentley 6102, Australia

<sup>2</sup> System Medicine, Steno Diabetes Center Copenhagen, 2730 Herlev, Denmark;

<sup>3</sup> Biotechnology and Drug Development Research Laboratory, Curtin Health Innovation Research Institute, Bentley 6102, Australia

<sup>4</sup> Curtin Health Innovation Research Institute, Bentley 6102, Australia

\* Correspondence: [crispin.dass@curtin.edu.au](mailto:crispin.dass@curtin.edu.au); Tel.: +61-8-9266-1489

**Supplemental Table S1** List of identified metabolites extracted from MS-DIAL

**Supplemental Table S2** The mean value of the significant metabolites' peak intensity

**Supplemental Table S3** Pathway Enrichment analysis of altered metabolites

**Supplemental Figure S1** Variable importance in projection (VIP) scores indicate the most important metabolites that contribute to the separation of metabolic profiles among groups

**Table S1.** List of identified metabolites extracted from MS-DIAL.

| Metabolite name          | Average Rt(min) | Average RI | Quant mass | Class                                   |
|--------------------------|-----------------|------------|------------|-----------------------------------------|
| 1-Monopalmitin           | 14.005          | 2585.56    | 371.3      | Lipids and lipid-like molecules         |
| 2-Aminoadipic acid       | 10.042          | 1729.86    | 73         | Organic acids and derivatives           |
| 3-Hydroxyisovaleric acid | 6.742           | 1223.26    | 131.0133   | Lipids and lipid-like molecules         |
| 4-Hydroxybutanoic acid   | 6.992           | 1258.62    | 116.975    | Organometallic compounds                |
| Acetic acid              | 12.399          | 2209.06    | 69.05      | Lipids and lipid-like molecules         |
| Adenosine                | 14.296          | 2655.68    | 230.0444   | Nucleosides, nucleotides, and analogues |
| alpha-Ketoglutaric acid  | 9.143           | 1574.42    | 73.1       | Organic acids and derivatives           |
| Aminomalonic acid        | 8.574           | 1482.19    | 147.02     | Organic acids and derivatives           |
| Arachidic acid           | 13.395          | 2440.7     | 369.32     | Organometallic compounds                |
| Arachidonic acid         | 13.162          | 2386.52    | 80         | Lipids and lipid-like molecules         |
| Cholesterol              | 17.227          | 3265.5     | 129.0063   | Lipids and lipid-like molecules         |
| Citric acid              | 10.623          | 1843.8     | 73.025     | Organic acids and derivatives           |
| Cysteine                 | 9.109           | 1568.8     | 69.06      | Organic acids and derivatives           |
| D-Arabitol               | 10.114          | 1743.83    | 217.0778   | Organic oxygen compounds                |
| Dihydrouacil             | 6.138           | 1137.92    | 56.02      | Organoheterocyclic compounds            |
| 3-Hydroxybutyric acid    | 6.27            | 1156.51    | 191.0636   | Organic acids and derivatives           |
| DL-Homocysteine          | 9.752           | 1676.77    | 234.0583   | Organic acids and derivatives           |
| L-5-Oxoproline           | 8.923           | 1537.46    | 73.06      | Organic acids and derivatives           |
| D-Ribose 5-phosphate     | 12.116          | 2143.26    | 315.0143   | Organic oxygen compounds                |
| D-Threitol               | 8.82            | 1520.24    | 73.1       | Organic oxygen compounds                |
| Ethanolamine             | 7.192           | 1286.86    | 174.0813   | Organometallic compounds                |
| Fumaric acid             | 7.583           | 1342.11    | 81.95      | Organic acids and derivatives           |
| GABA                     | 8.954           | 1542.65    | 174.1      | Organic acids and derivatives           |
| Glucose 6-phosphate      | 13.103          | 2372.75    | 387.0616   | Organic oxygen compounds                |
| Glutaric acid            | 8.085           | 1413.03    | 84.06667   | Organic acids and derivatives           |
| Glycerol                 | 7.263           | 1296.93    | 191.0125   | Organometallic compounds                |
| Glycine                  | 7.488           | 1328.65    | 73.05833   | Organic acids and derivatives           |
| Inosine                  | 14.046          | 2595.37    | 73.06      | Nucleosides, nucleotides, and analogues |
| Malate                   | 8.66            | 1494.41    | 73.01538   | Organic acids and derivatives           |
| Phenylalanine            | 9.568           | 1645.82    | 218.1      | Organic acids and derivatives           |
| Proline                  | 7.423           | 1319.49    | 142.1      | Organic acids and derivatives           |
| Threonine                | 8.023           | 1404.33    | 73.0625    | Organic acids and derivatives           |
| Lactic acid              | 5.578           | 1044.26    | 73.05      | Organic acids and derivatives           |
| Lysine                   | 11.145          | 1946.16    | 174.1      | Organic acids and derivatives           |
| Alanine                  | 5.919           | 1106.96    | 116.0875   | Organic acids and derivatives           |
| Asparagine               | 9.802           | 1685.19    | 231.025    | Organic acids and derivatives           |
| Aspartic acid            | 8.246           | 1435.88    | 101.96     | Organic acids and derivatives           |
| Glutamic acid            | 9.464           | 1628.37    | 247.1      | Organic acids and derivatives           |
| Glutamine                | 10.359          | 1792.02    | 155.975    | Organic acids and derivatives           |
| Linolenic acid           | 12.508          | 2234.34    | 80         | Lipids and lipid-like molecules         |
| L-Leucine                | 7.093           | 1272.9     | 231.0769   | Organic acids and derivatives           |
| Methionine               | 8.889           | 1531.85    | 176.075    | Organic acids and derivatives           |

|                                                 |        |         |          |                                         |
|-------------------------------------------------|--------|---------|----------|-----------------------------------------|
| <b>Serine</b>                                   | 7.835  | 1377.68 | 173      | Organic acids and derivatives           |
| <b>Tryptophan</b>                               | 12.62  | 2260.43 | 202.0538 | Organoheterocyclic compounds            |
| <b>Tyrosine</b>                                 | 11.247 | 1966.03 | 218.1    | Organic acids and derivatives           |
| <b>Malonic acid</b>                             | 6.476  | 1185.6  | 73.1     | Organic acids and derivatives           |
| <b>Maltose</b>                                  | 14.665 | 2744.56 | 73.04285 | Organic oxygen compounds                |
| <b>Melibiose</b>                                | 15.052 | 2837.76 | 204.0429 | Organic oxygen compounds                |
| <b>Methionine sulfoxide</b>                     | 10.228 | 1766.3  | 128.0364 | Organic acids and derivatives           |
| <b>Methylmalonic acid</b>                       | 6.612  | 1204.87 | 147.04   | Organic acids and derivatives           |
| <b>Myo-Inositol</b>                             | 11.766 | 2067.82 | 147.0333 | Organic oxygen compounds                |
| <b>valine</b>                                   | 6.51   | 1190.52 | 86.05    | Organic acids and derivatives           |
| <b>Oleic acid</b>                               | 12.478 | 2227.4  | 75       | Lipids and lipid-like molecules         |
| <b>O-Phosphoethanolamine</b>                    | 10.45  | 1809.81 | 299.0077 | Organic acids and derivatives           |
| <b>Palmitic acid</b>                            | 11.674 | 2049.86 | 73.1     | Lipids and lipid-like molecules         |
| <b>Palmitoleic Acid</b>                         | 11.569 | 2029.26 | 101.96   | Organometallic compounds                |
| <b>Pantothenic acid</b>                         | 11.518 | 2019.12 | 103.0077 | Organic acids and derivatives           |
| <b>Stearic acid</b>                             | 12.575 | 2249.89 | 73       | Lipids and lipid-like molecules         |
| <b>Succinic acid</b>                            | 7.472  | 1326.43 | 247.0667 | Organic acids and derivatives           |
| <b>Uracil</b>                                   | 7.695  | 1357.99 | 184.0333 | Organoheterocyclic compounds            |
| <b>Uridine 5'-diphospho-N-acetylglucosamine</b> | 10.449 | 1809.54 | 231      | Nucleosides, nucleotides, and analogues |

RT retention time, RI retention indices

**Table S2.** The mean value of the significant metabolites' peak intensity.

| <b>Metabolites</b>         | <b>Groups</b> | <b>Mean</b> |
|----------------------------|---------------|-------------|
| <b>Adenosine</b>           | N-control     | 1.207529    |
|                            | N-treated     | 0.052681    |
|                            | H-control     | -0.86652    |
|                            | H-treated     | -0.39369    |
| <b>Citric acid</b>         | N-control     | 0.808662    |
|                            | N-treated     | 0.749081    |
|                            | H-control     | -0.80556    |
|                            | H-treated     | -0.75219    |
| <b>Glucose 6-phosphate</b> | N-control     | -0.38244    |
|                            | N-treated     | -1.08695    |
|                            | H-control     | 1.014286    |
|                            | H-treated     | 0.455104    |
| <b>Glutamic acid</b>       | N-control     | -0.99802    |
|                            | N-treated     | -0.49917    |
|                            | H-control     | 1.128907    |
|                            | H-treated     | 0.368277    |
| <b>Glutamine</b>           | N-control     | -0.73131    |
|                            | N-treated     | -0.7921     |
|                            | H-control     | 0.51794     |
|                            | H-treated     | 1.005465    |
| <b>Lactic acid</b>         | N-control     | -0.66212    |
|                            | N-treated     | -1.07169    |
|                            | H-control     | 1.070445    |
|                            | H-treated     | 0.663359    |
| <b>Malate</b>              | N-control     | -0.86021    |
|                            | N-treated     | -0.64782    |
|                            | H-control     | 1.190296    |

|                      |           |          |
|----------------------|-----------|----------|
|                      |           |          |
|                      | H-treated | 0.317733 |
| <b>Myo-Inositol</b>  | N-control | -0.65143 |
|                      | N-treated | -0.89268 |
|                      | H-control | 0.548133 |
|                      | H-treated | 0.995974 |
| <b>Phenylalanine</b> | N-control | 1.139066 |
|                      | N-treated | 0.476861 |
|                      | H-control | -0.88983 |
|                      | H-treated | -0.7261  |

**Key:** H, high glucose, N, normal glucose

**Table S3.** Pathway Enrichment analysis of altered metabolites.

| <b>Metabolic pathway</b>                           | <b><sup>a</sup> Total Cmpd</b> | <b><sup>b</sup> hits</b> | <b><sup>c</sup> Raw p</b> | <b><sup>d</sup> FDR</b> |
|----------------------------------------------------|--------------------------------|--------------------------|---------------------------|-------------------------|
| <b>Warburg Effect</b>                              | 58                             | 6                        | 1.88E-06                  | 0.000185                |
| <b>Transfer of Acetyl Groups into Mitochondria</b> | 22                             | 2                        | 0.0145                    | 0.287                   |
| <b>Inositol Phosphate Metabolism</b>               | 26                             | 2                        | 0.02                      | 0.287                   |
| <b>Purine Metabolism</b>                           | 74                             | 3                        | 0.0222                    | 0.287                   |
| <b>Phenylalanine and Tyrosine Metabolism</b>       | 28                             | 2                        | 0.0231                    | 0.287                   |
| <b>Urea Cycle</b>                                  | 29                             | 2                        | 0.0247                    | 0.287                   |
| <b>Ammonia Recycling</b>                           | 32                             | 2                        | 0.0297                    | 0.287                   |
| <b>Citric Acid Cycle</b>                           | 32                             | 2                        | 0.0297                    | 0.287                   |
| <b>Inositol Metabolism</b>                         | 33                             | 2                        | 0.0315                    | 0.287                   |
| <b>Amino Sugar Metabolism</b>                      | 33                             | 2                        | 0.0315                    | 0.287                   |
| <b>Aspartate Metabolism</b>                        | 35                             | 2                        | 0.0352                    | 0.287                   |
| <b>Gluconeogenesis</b>                             | 35                             | 2                        | 0.0352                    | 0.287                   |
| <b>Nicotinate and Nicotinamide Metabolism</b>      | 37                             | 2                        | 0.039                     | 0.287                   |
| <b>Galactose Metabolism</b>                        | 38                             | 2                        | 0.041                     | 0.287                   |
| <b>Pyruvate Metabolism</b>                         | 48                             | 2                        | 0.0628                    | 0.399                   |
| <b>Glutamate Metabolism</b>                        | 49                             | 2                        | 0.0651                    | 0.399                   |
| <b>Phenylacetate Metabolism</b>                    | 9                              | 1                        | 0.0767                    | 0.442                   |
| <b>Malate-Aspartate Shuttle</b>                    | 10                             | 1                        | 0.0849                    | 0.462                   |
| <b>Glucose-Alanine Cycle</b>                       | 13                             | 1                        | 0.109                     | 0.562                   |
| <b>Alanine Metabolism</b>                          | 17                             | 1                        | 0.14                      | 0.655                   |
| <b>Phosphatidylinositol Phosphate Metabolism</b>   | 17                             | 1                        | 0.14                      | 0.655                   |
| <b>Nucleotide Sugars Metabolism</b>                | 20                             | 1                        | 0.163                     | 0.697                   |
| <b>Glutathione Metabolism</b>                      | 21                             | 1                        | 0.171                     | 0.697                   |
| <b>Betaine Metabolism</b>                          | 21                             | 1                        | 0.171                     | 0.697                   |
| <b>Glycolysis</b>                                  | 25                             | 1                        | 0.2                       | 0.767                   |
| <b>Cysteine Metabolism</b>                         | 26                             | 1                        | 0.207                     | 0.767                   |
| <b>Selenoamino Acid Metabolism</b>                 | 28                             | 1                        | 0.222                     | 0.767                   |
| <b>Pentose Phosphate Pathway</b>                   | 29                             | 1                        | 0.229                     | 0.767                   |
| <b>Folate Metabolism</b>                           | 29                             | 1                        | 0.229                     | 0.767                   |
| <b>Lysine Degradation</b>                          | 30                             | 1                        | 0.236                     | 0.767                   |
| <b>Starch and Sucrose Metabolism</b>               | 31                             | 1                        | 0.243                     | 0.767                   |
| <b>Beta-Alanine Metabolism</b>                     | 34                             | 1                        | 0.263                     | 0.805                   |
| <b>Propanoate Metabolism</b>                       | 42                             | 1                        | 0.315                     | 0.9                     |
| <b>Methionine Metabolism</b>                       | 43                             | 1                        | 0.321                     | 0.9                     |
| <b>Histidine Metabolism</b>                        | 43                             | 1                        | 0.321                     | 0.9                     |
| <b>Arginine and Proline Metabolism</b>             | 53                             | 1                        | 0.381                     | 1                       |
| <b>Glycine and Serine Metabolism</b>               | 59                             | 1                        | 0.415                     | 1                       |
| <b>Pyrimidine Metabolism</b>                       | 59                             | 1                        | 0.415                     | 1                       |
| <b>Valine, Leucine and Isoleucine Degradation</b>  | 60                             | 1                        | 0.421                     | 1                       |
| <b>Tryptophan Metabolism</b>                       | 60                             | 1                        | 0.421                     | 1                       |
| <b>Arachidonic Acid Metabolism</b>                 | 69                             | 1                        | 0.468                     | 1                       |
| <b>Tyrosine Metabolism</b>                         | 72                             | 1                        | 0.483                     | 1                       |

<sup>a</sup> Total Cmpd: total number of compounds in the pathway, <sup>b</sup> Hit: actually matched number from the data

<sup>c</sup> Raw p: p-value calculated from the enrichment analysis, <sup>d</sup> FDR: p-value adjusted using False Discovery Rate

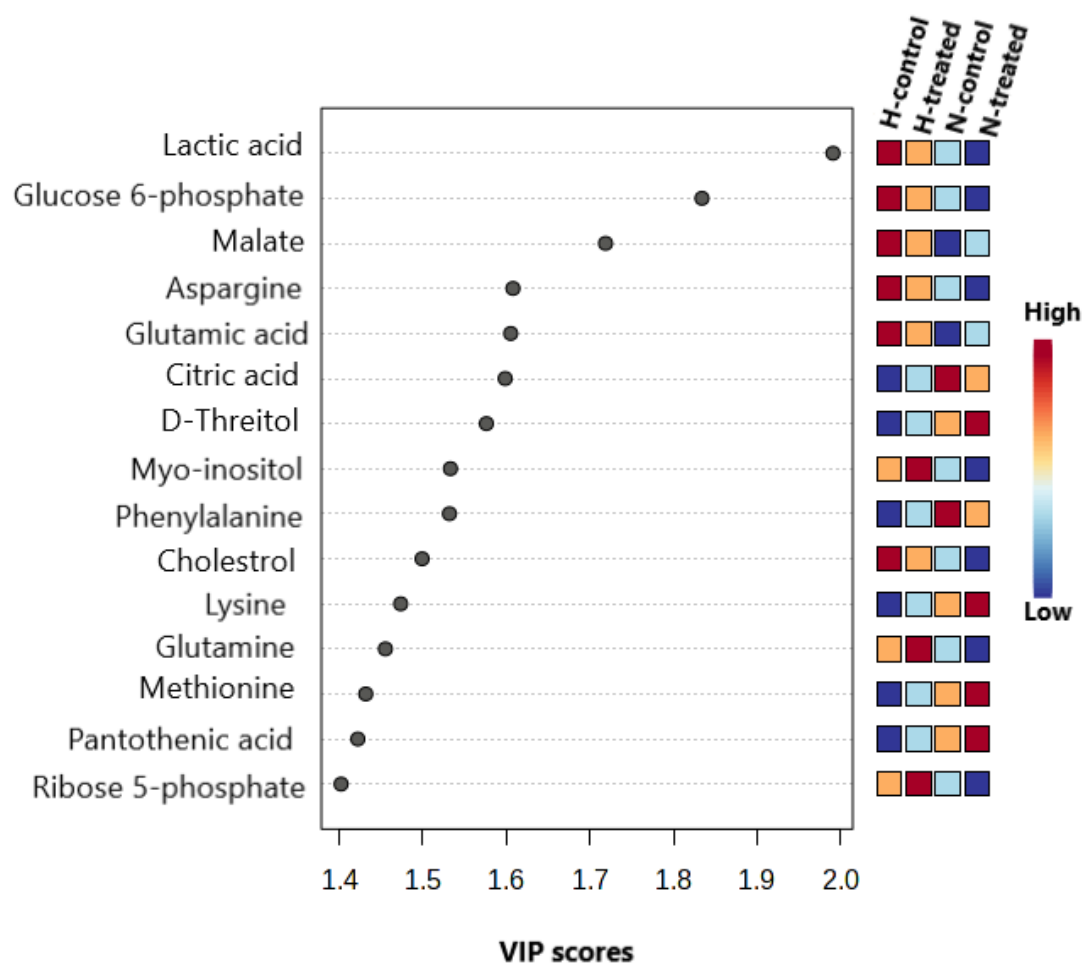

**Figure S1.** Variable importance in projection (VIP) scores indicate the most important metabolites that contribute to the separation of metabolic profiles among groups. Metabolite abundances are indicated on a colour scale from blue to red, which represents low and high, respectively.
